# Supplementary material for: Genomic interrogation of a MAGIC population highlights genetic factors controlling fiber quality traits in cotton
Source: PubMed Central journal article supplement (PMC8764025; doi:10.1038/s42003-022-03022-7), 2022-01-17
Supplement: 42003_2022_3022_MOESM2_ESM.pdf [file 42003_2022_3022_MOESM2_ESM.pdf]

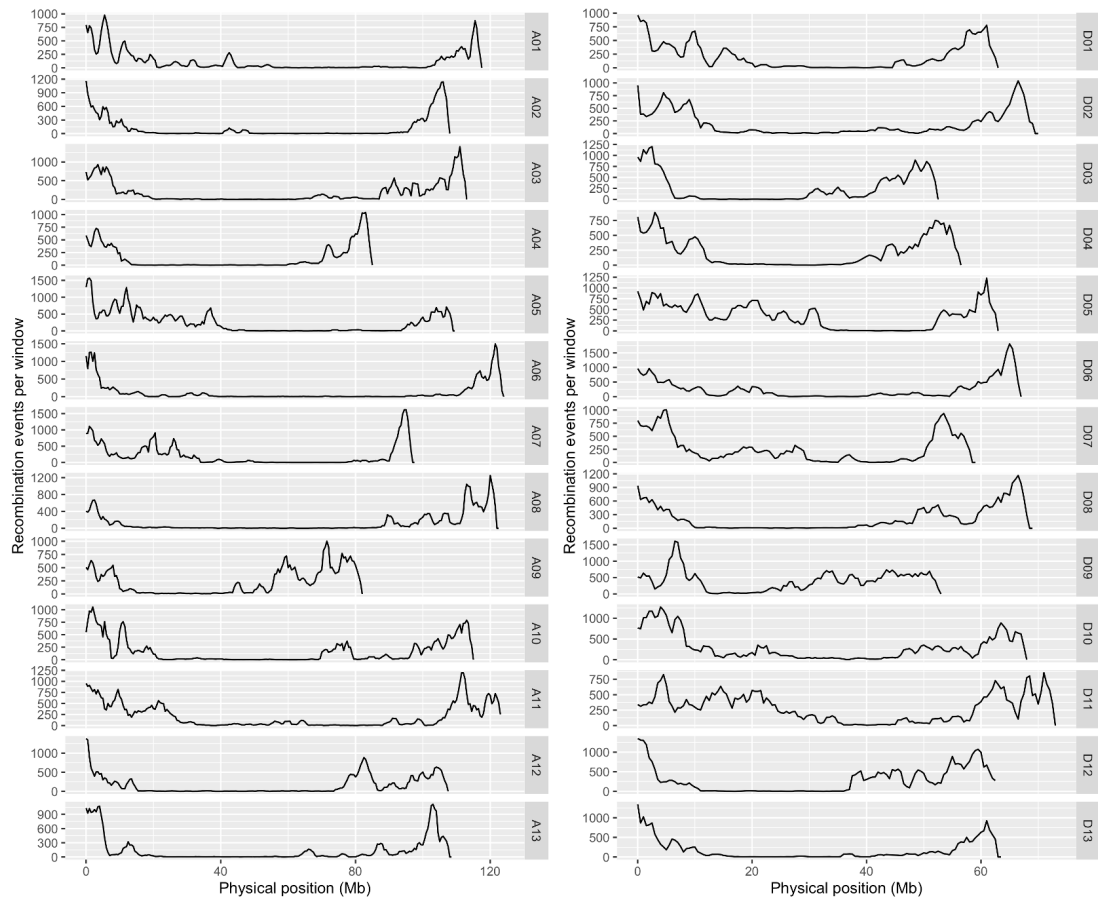

**Supplementary Fig. 1 Recombination events for 26 chromosomes.** Each estimated point indicates the sum of recombination events in a 2-Mb sliding window across the 550 MAGIC RILs.

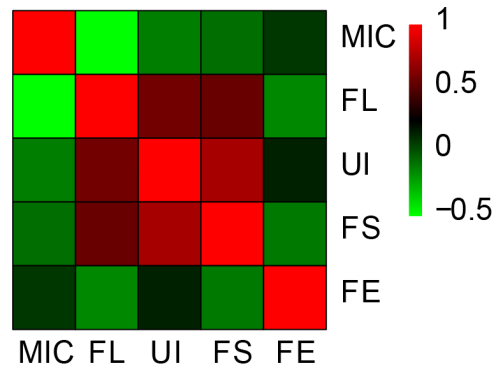

**Supplementary Fig. 2** A heatmap of Pearson correlation coefficients over five fiber quality traits. The five traits include elongation (FE), length (FL), strength (FS), uniformity (UI) and micronaire value (MIC).

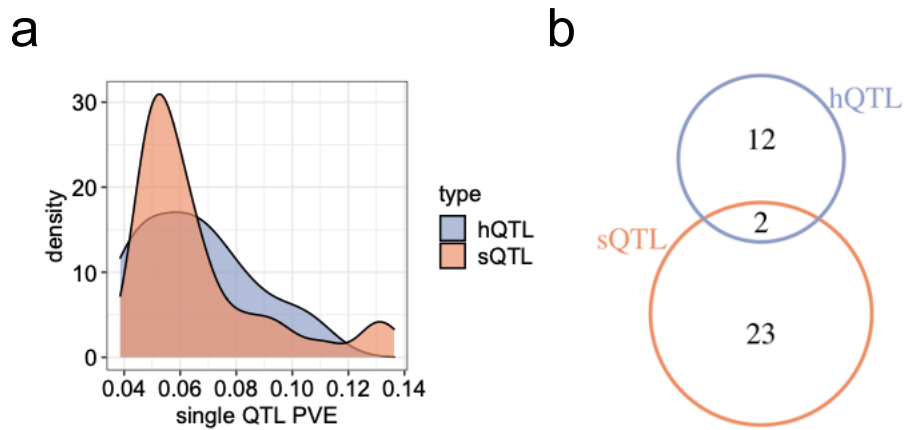

**Supplementary Fig. 3** Overview of the two methods of GWAS analysis. **a** Comparison of phenotypic variance explained (PVE) by single QTL identified by sGWAS vs. hGWAS. **b** Venn diagram of co-localization between sQTL and hQTL, summed over traits.

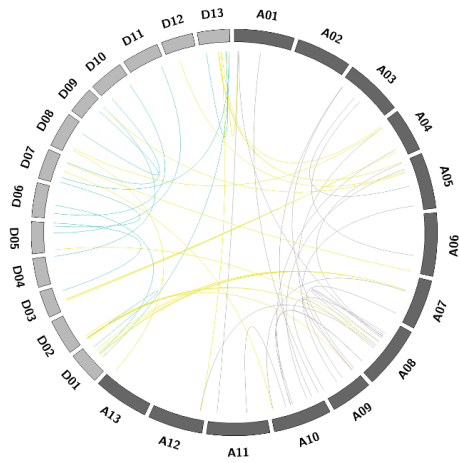

MIC

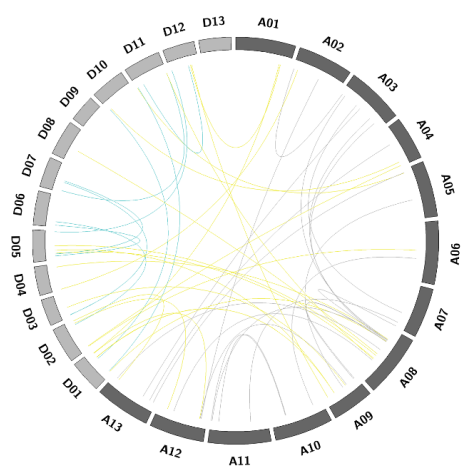

FL

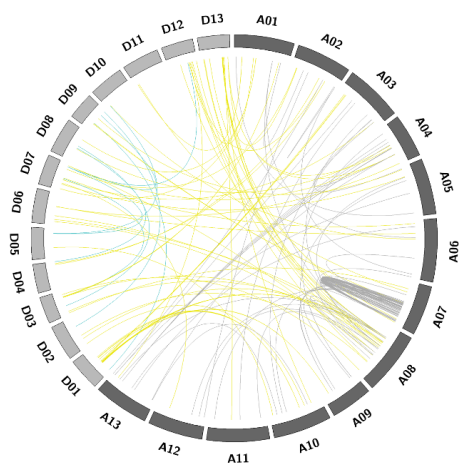

FS

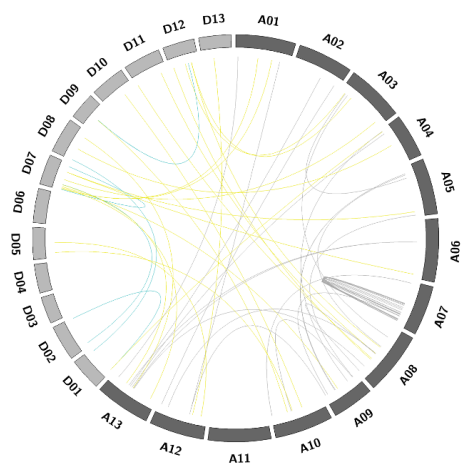

UI

**Supplementary Fig. 4 Significant epistasis in trait variance.** Continued from Fig 6a. Each circle represents a trait, and each line links an epistatic pair of loci.

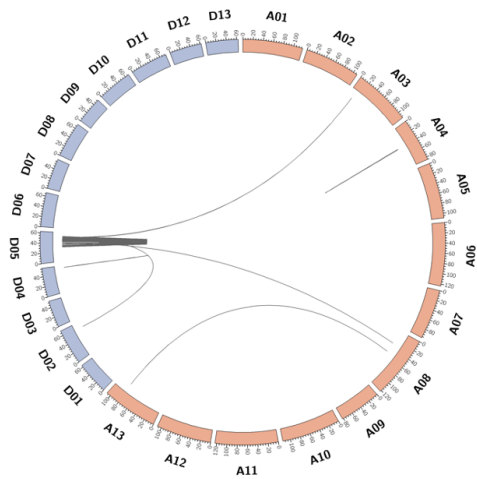

FE

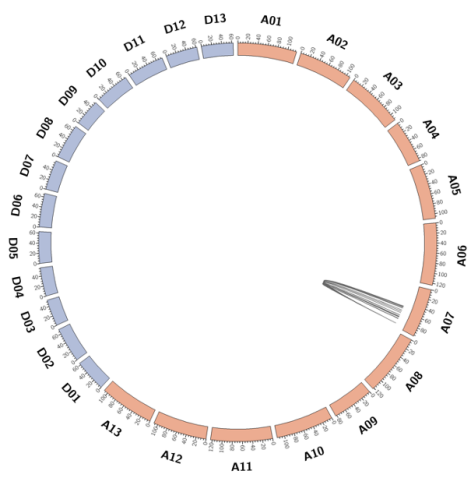

UI

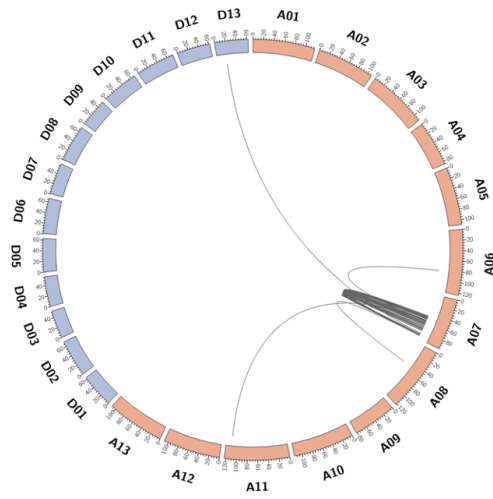

FS

**Supplementary Fig. 5 epiQTLs linked with significant loci identified by sGWAS.**

The interval of epiQTL was defined as the physical position range delimited by the bin.

Traits without these linked epiQTLs are not indicated.

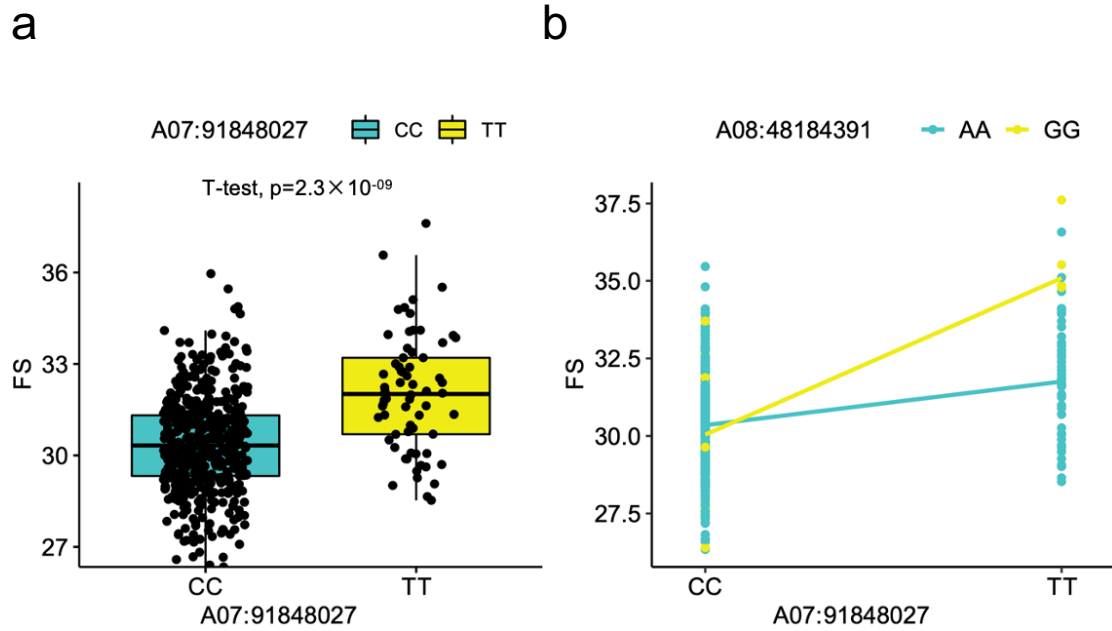

**Supplementary Fig. 6 An example of the epistatic effect between a sQTL and other locus.** **a** Boxplot of FS in two genotypes of a significant locus (A07:91848027) identified by sGWAS. **b** Interaction plot for epistasis between A07:91848027 and A08:48184391.

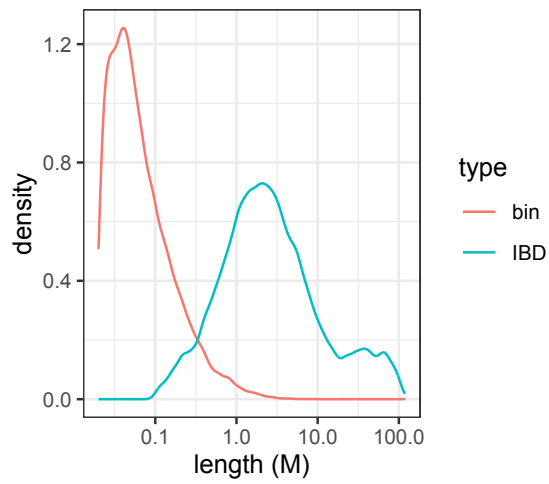

**Supplementary Fig. 7 Density plots of the length of IBD segments and bins.** The genome of each MAGIC RIL was divided into 18,003 bins based on all identified recombination break points.
