# Supplementary material for: Genomic interrogation of a MAGIC population highlights genetic factors controlling fiber quality traits in cotton
Source: PubMed Central journal article supplement (PMC8764025; doi:10.1038/s42003-022-03022-7), 2022-01-17
Supplement: 42003_2022_3022_MOESM3_ESM.pdf [file 42003_2022_3022_MOESM3_ESM.pdf]

## Description of Additional Supplementary Files

**File name:** Supplementary Data 1

**Description:** Summary of categorized SNPs.

**File name:** Supplementary Data 2

**Description:** Summary of categorized SNPs in exonic regions.

**File name:** Supplementary Data 3

**Description:** IBD information.

**File name:** Supplementary Data 4

**Description:** The average number of recombination events per generation per chromosome.

**File name:** Supplementary Data 5

**Description:** Information of recombination break points.

**File name:** Supplementary Data 6

**Description:** Summary of QTL via sGWAS.

**File name:** Supplementary Data 7

**Description:** Genes with nonsynonymous SNPs in sQTL.

**File name:** Supplementary Data 8

**Description:** The estimated heritability for each trait and summary of QTL number and their contributions to total PVE.

**File name:** Supplementary Data 9

**Description:** Summary of QTL via hGWAS.

**File name:** Supplementary Data 10

**Description:** Genes with non-synonymous SNPs in hQTL.

**File name:** Supplementary Data 11

**Description:** List of significant epistatic pairs.

**File name:** Supplementary Data 12

**Description:** The number and proportion of significant epistatic pairs of different type.

**File name:** Supplementary Data 13

**Description:** Information of epiQTLs linked with significant loci identified by sGWAS.

**File name:** Supplementary Data 14

**Description:** Bin information across the whole genome.
